# Supplementary material for: Vitamin D and vitamin K status in postmenopausal women with normal and low bone mineral density
Source: publisher site journal article supplement (doi:10.1515/cclm-2023-1443), 2023-12-30
Supplement: Supplementary file 1 [file j_cclm-2023-1443_suppl_001.docx]

**Supplemental Table 1:** Anthropometric data, biochemical markers of bone metabolism, and vitamin metabolites in postmenopausal women with normal, osteopenic and osteoporotic BMD.

| **Parameter** | **Controls*** | **Osteopenia**** | **Osteoporosis***** | **P*/P**** | **P*/P***** | | **P**/P***** |
| --- | --- | --- | --- | --- | --- | --- | --- |
| **Mean (SD) / Median (IQR)** | **Mean (SD) / Median (IQR)** | **Mean (SD) / Median (IQR)** |
| Number | 68 | 46 | 17 |  |  | |  |
| Age (year) | 57.1 ± 7.5 | 62.7 ± 7.4 | 65.7 ± 10.1 | < 0.001 | 0.002 | | 0.325 |
| BMI (kg/m2) | 25.9 ± 5.0 | 26.5 ± 4.7 | 25.5 ± 5.2 | 0.382 | 0.552 | | 0.337 |
| LSBMD (g/cm2) | 1.11 ± 0.17 | 1.02 ± 0.12 | 0.85 ± 0.09 | 0.003 | < 0.001 | | < 0.001 |
| FNBMD (g/cm2) | 0.88 ± 0.13 | 0.82 ± 0.10 | 0.76 ± 0.08 | 0.001 | < 0.001 | | 0.064 |
| TH-BMD (g/cm2) | 0.92 ± 0.13 | 0.85 ± 0.12 | 0.77 ± 0.09 | 0.005 | < 0.001 | | 0.004 |
| Trabecular bone score | 1.30 ± 0.10 | 1.30 ± 0.08 | 1.29 ±1.19 | 0.564 | 0.849 | | 0.929 |
| FraxHip (%) | 0.90 (0.40 – 1.88) | 1.55 (0.80 – 3.10) | 2.60 (1.6 – 4.1) | 0.007 | < 0.001 | | 0.055 |
| Creatinine (mg/dL) | 0.72 (0.67 – 0.76) | 0.69 (0.66 – 0.74) | 0.70 (0.66 – 0.76) | 0.056 | 0.266 | | 0.944 |
| Calcium (mmol/L) | 2.30 (2.25 – 2.33) | 2.30 (2.25 – 2.35) | 2.33 (2.28 – 2.35) | 0.302 | 0.154 | | 0.564 |
| PTH (ng/L) | 47.2 (39.0 – 57.8) | 50.4 (38.0- 60.5) | 58.6 (48.9 – 72.1) | 0.548 | 0.012 | | 0.047 |
| PINP (µg/L) | 45.3 (36.6 – 58.1) | 44.3 (36.0 – 60.0) | 39.1 (25.5 – 59.9) | 0.795 | 0.206 | | 0.369 |
| CTX-I (ng/L) | 393 (293 – 512) | 406 (337 - 548) | 326 (179 - 513) | 0.507 | 0.312 | | 0.098 |
| 25(OH)D3 (nmol/L) | 48.3 (34.5 – 63.7) | 57.9 (44.8 – 67.4) | 41.1 (27.1 – 66.2) | 0.033 | 0.538 | | 0.051 |
| 25(OH)D2 (nmol/L) | 0.99 (0.83 – 1.48) | 0.85 (0.62 – 1.26) | 0.89 (0.58 – 1.33) | 0.036 | 0.144 | | 0.816 |
| Total 25(OH)D (nmol/L) | 49.5 (36.7 – 65.0) | 59.2 (45.6 – 68.3) | 41.6 (27.6 – 67.2) | 0.056 | 0.517 | | 0.057 |
| 24,25(OH)2D3 (nmol/L) | 3.1 (1.7 – 3.9) | 3.5 (2.4 – 4.2) | 2.2 (1.2 – 3.8) | 0.102 | 0.187 | | 0.020 |
| VMR (%) | 5.9 (4.8 – 6.9) | 6.0 (4.8 – 6.9) | 5.2 (3.9 – 5.6) | 0.865 | 0.030 | | 0.021 |
| Total vitamin K (nmol/L) | 1.29 (0.91 – 2.64) | 1.57 (1.11 – 2.33) | 1.27 (1.04 – 2.76) | 0.283 | 0.520 | | 0.986 |
| Vitamin K1 (nmol/L) | 1.03 (0.51 – 1.81) | 1.01 (0.53 – 2.22) | 1.13 (0.61 – 1.51) | 0.815 | 0.750 | | 0.932 |
| MK4 (nmol/L) | 0.15 (0.10 – 0.26) | 0.14 (0.09 – 0.23) | 0.13 (0.07 – 0.26) | 0.365 | 0.373 | | 0.775 |
| MK7 (nmol/L) | 0.55 (0.37 – 0.72) | 0.57 (0.36 – 0.89) | 0.50 (0.33 – 0.68) | 0.599 | 0.404 | 0.307 | |

BMI – body mass index, LS BMD – lumbar spine bone mineral density, FN BMD – femoral neck bone mineral density, TH BMD – total hip bone mineral density, PTH – parathyroid hormone, PINP – type I procollagen-N-terminal-peptide, CTX-I – C-terminal crosslinks of collagen type I; 25(OH)D – 25-hydroxyvitamin, 24,25(OH)2D3 – 24,25-dihydroxyvitamin D3, VMR – vitamin D metabolite ratio, MK-4 – menaquinone-4, MK-7 – menaquinone-7
p = Mann Whitney U-test; * controls vs. osteopenia group, ** controls vs. osteoporosis group, *** osteopenia vs. osteoporosis group
